# Supplementary material for: Integrating 3D video tracking with the standard WHO tunnel assay — a proof-of-concept to support improving insecticide-treated nets for mosquito control
Source: Research Square preprint supplement (doi:10.21203/rs.3.rs-8720695/v1), 2026-02-16
Supplement: Supplementary file 1 [file fee6c67cfc07839fbef7a0e4.docx]

**Supplementary information S1**


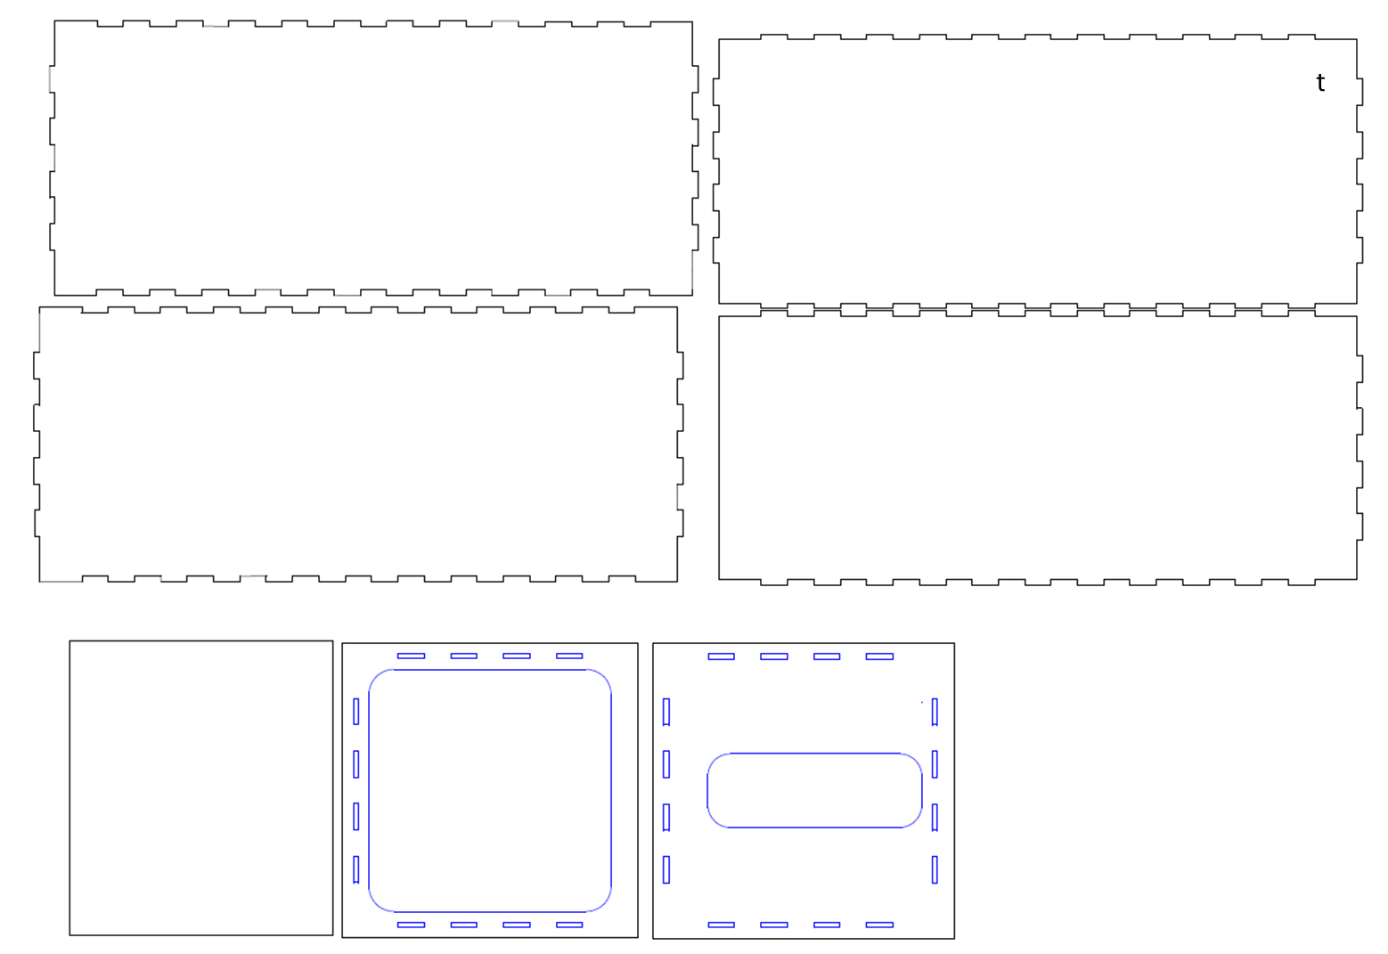


**Figure S1: The CAD sketch of the dismountable plexiglas tunnel.** The panel *t* is transparent. All other elements are opaque to have a more homogeneous light for the video tracking.
